# Supplementary material for: Hydration and Diffusion of H+, Li+, Na+, Cs+ Ions in Cation-Exchange Membranes Based on Polyethylene- and Sulfonated-Grafted Polystyrene Studied by NMR Technique and Ionic Conductivity Measurements
Source: MDPI journal article supplement (doi:10.3390/membranes10100272), 2020-10-01
Supplement: s1 [file s1]

# Supplementary Materials: Hydration and Diffusion of $H^+$ , $Li^+$ , $Na^+$ , $Cs^+$ Ions in Cation-Exchange Membranes Based on Polyethylene- and Sulfonated-Grafted Polystyrene Studied by NMR Technique and Ionic Conductivity Measurements

Vitaliy I. Volkov <sup>1,2,\*</sup>, Alexander V. Chernyak <sup>1,2</sup>, Daniil V. Golubenko <sup>3</sup>, Vladimir A. Tverskoy <sup>4</sup>, Georgiy A. Lochin <sup>1,5</sup>, Ervena S. Odjigaeva <sup>1,5</sup>, and Andrey B. Yaroslavl'tsev <sup>3</sup>

<sup>1</sup> Institute of Problems of Chemical Physics RAS, Chernogolovka 142432, Russia; chernyak@icp.ac.ru (A.V.C.); lochin.g@yandex.ru (G.A.L.); odzhigaeva.ervena@yandex.ru (E.S.O.)

<sup>2</sup> Scientific Center in Chernogolovka RAS, Chernogolovka 142432, Russia

<sup>3</sup> Kurnakov Institute of General and Inorganic Chemistry RAS, Moscow 119991, Russia; xpman2009@yandex.ru (D.V.G.); yaroslav@igic.ras.ru (A.B.Y.)

<sup>4</sup> Lomonosov Institute of Fine Chemical Technologies, MIREA–Russian Technological University, Moscow 119571, Russia; tverskoy@mitht.ru

<sup>5</sup> Faculty of Chemistry, Lomonosov Moscow State University, Moscow 119991, Russia

\* Correspondence: vitwolf@mail.ru or vitwolf@icp.ac.ru

Received: 12 August 2020; Accepted: 28 September 2020; Published: 1 October 2020

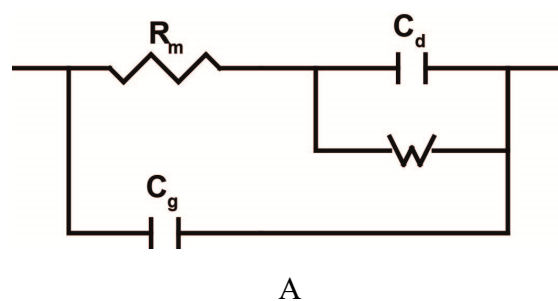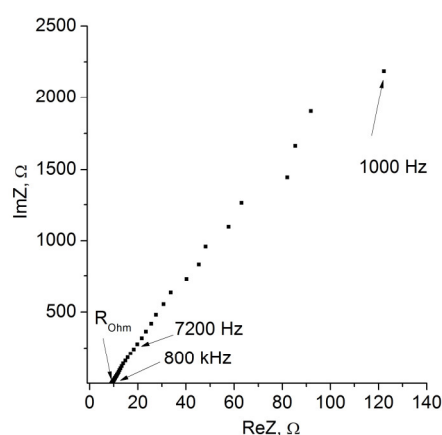

**Figure S1.** (A) EEC for a conductor with predominantly ionic conduction; (B) Typical Nyquist plot of MSC-membrane. Here is  $Cs$ -form at 75% RH.

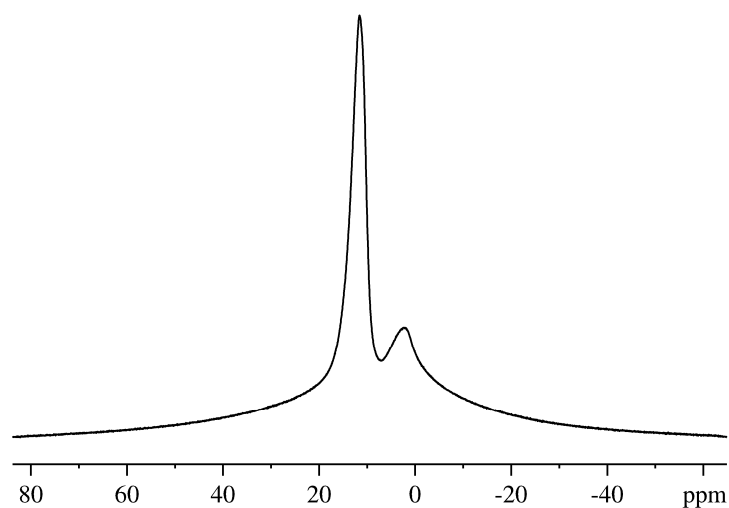

**Figure S2.**  $^1\text{H}$  NMR spectrum in  $\text{H}^+$  ionic form of MSC membrane at  $\text{RH}=95\%$  and  $T = 293\text{K}$

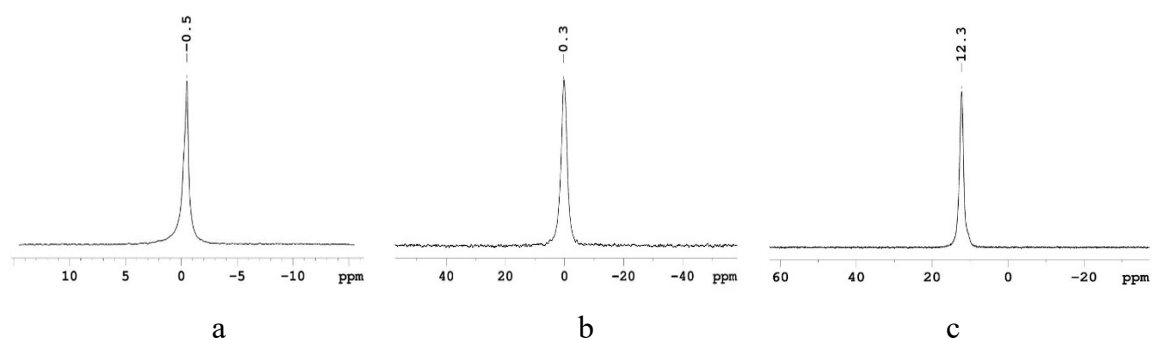

**Figure 3.** NMR spectra of  $^7\text{Li}$  (a),  $^{23}\text{Na}$  (b) and  $^{133}\text{Cs}$  (c) nuclei in appropriate ionic form of MSC membrane at  $\text{RH} = 95\%$ .

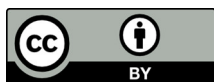

© 2020 by the authors. Licensee MDPI, Basel, Switzerland. This article is an open access article distributed under the terms and conditions of the Creative Commons Attribution (CC BY) license (<http://creativecommons.org/licenses/by/4.0/>).
